# Supplementary material
Source: PubMed Central journal article supplement (PMC3131989)
Supplement: cdd2010107x1.pdf [file cdd2010107x1.pdf]

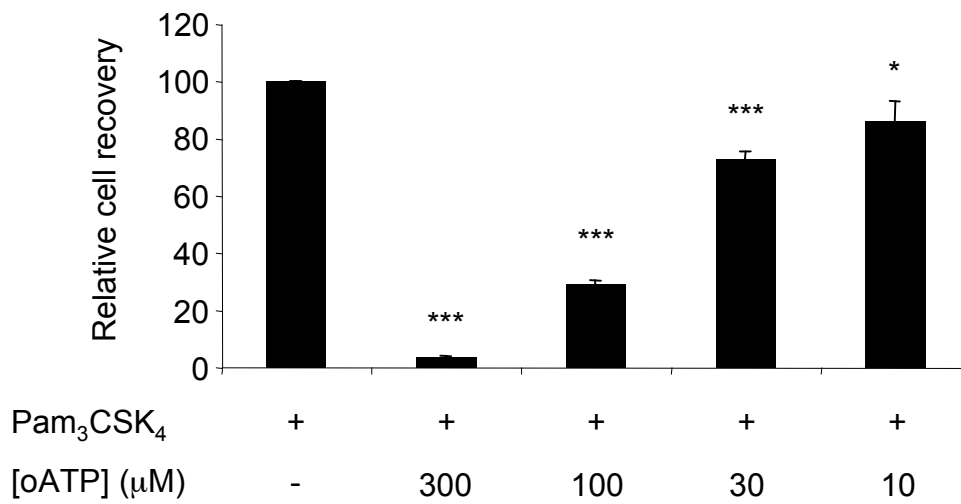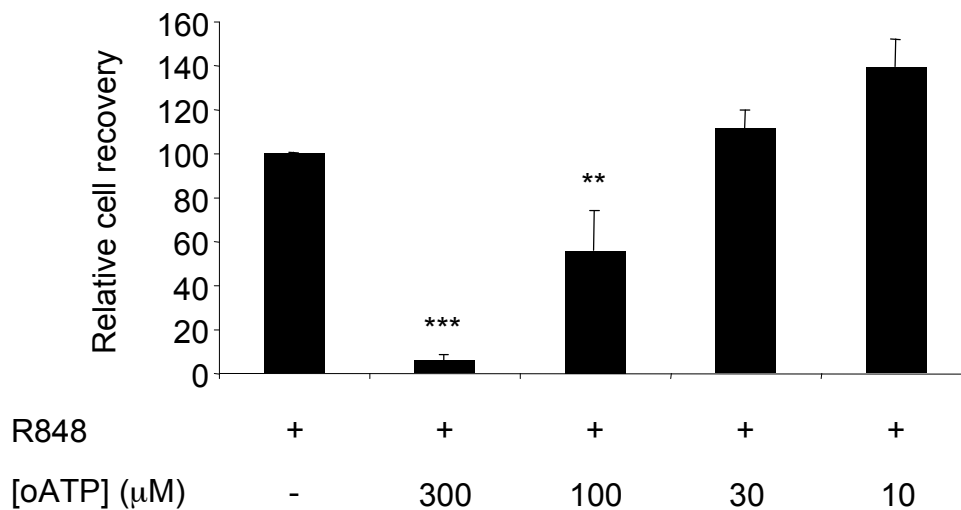

**Supplementary figure 1.** Dose-dependent inhibition of LKS<sup>+</sup> cell proliferation by oATP. One representative experiment out of three showing mean  $\pm$  SD (three replicates) cell recoveries from LKS<sup>+</sup> cells stimulated with Pam<sub>3</sub>CSK<sub>4</sub> (upper panel) and R848 (lower panel) in the presence of the indicated concentration of oATP. Student *t*-test was used to calculate *P* values. \*: *P* < 0.05; \*\*: *P* < 0.01; \*\*\*: *P* < 0.001.
