# Supplementary material
Source: PubMed Central journal article supplement (PMC3131989)
Supplement: cdd2010107x2.pdf [file cdd2010107x2.pdf]

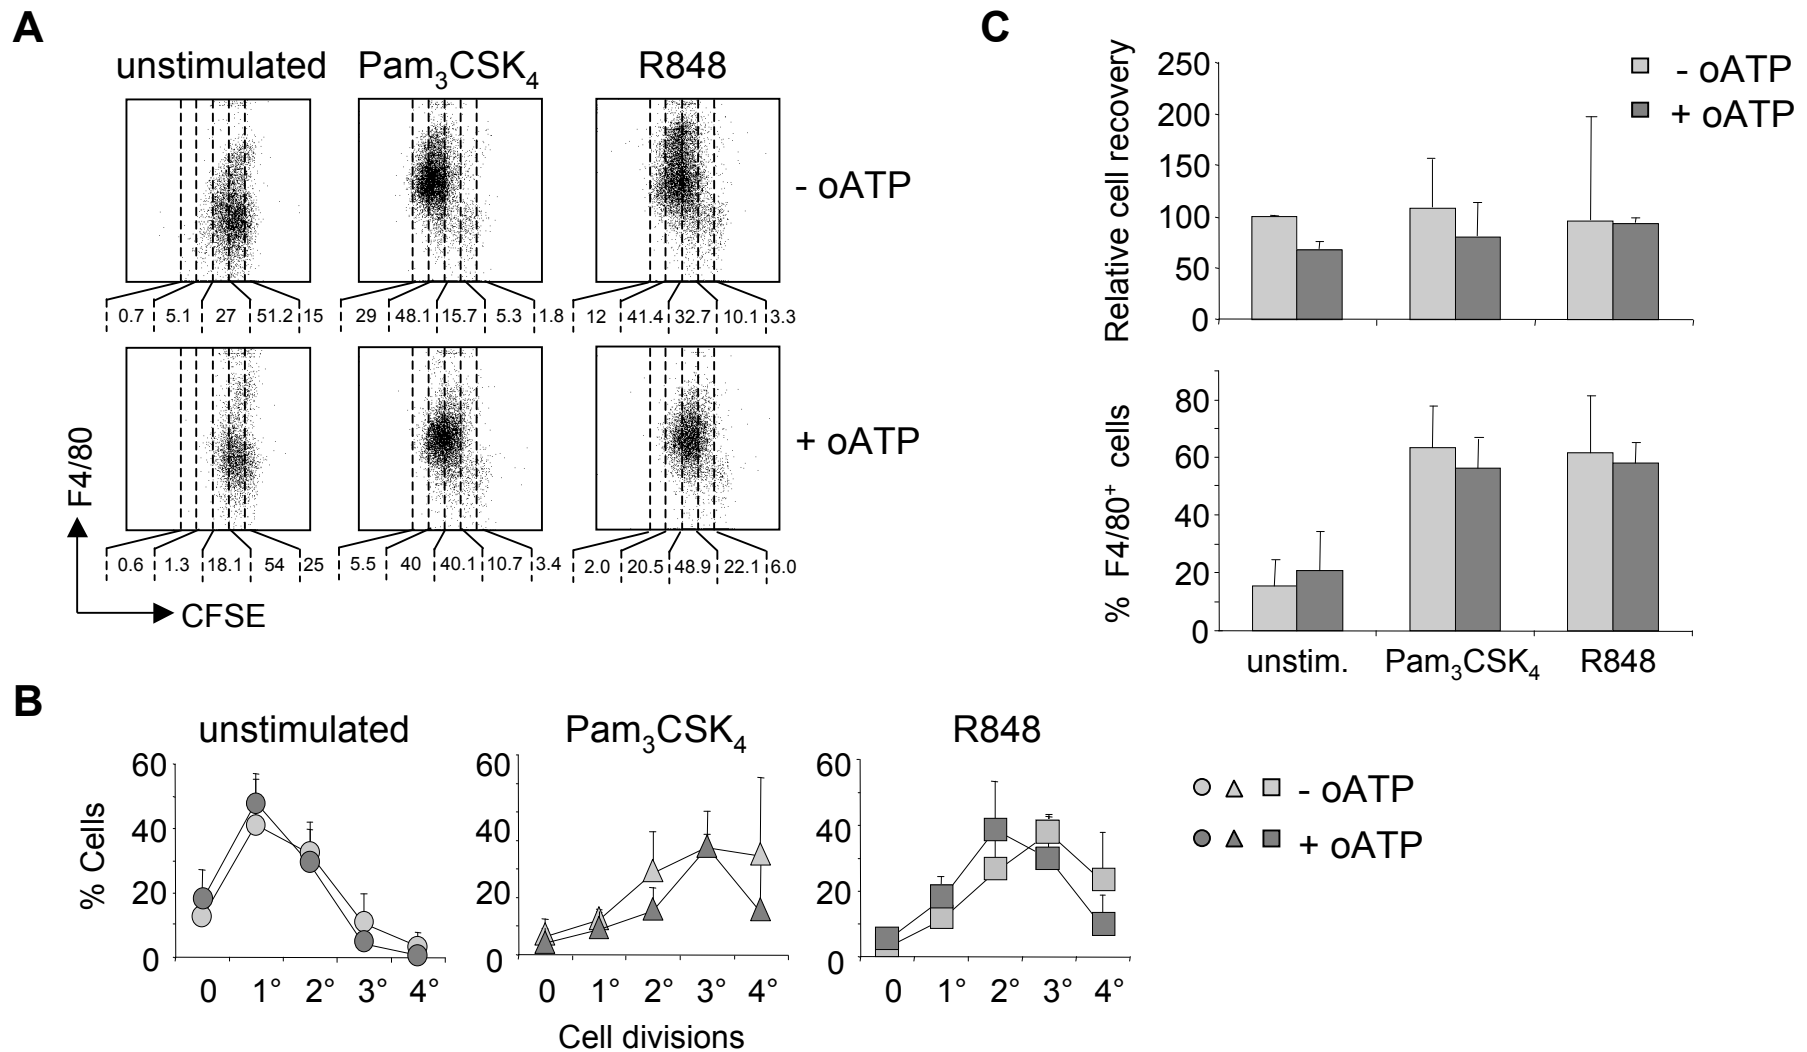

**Supplementary figure 2.** Unaffected GMPs cell cycling and differentiation by oATP. **(A):** Representative CFSE dilution and F4/80 staining in purified GMPs cultured in SCF and Flt3L conditioned medium (unstimulated) and with addition of Pam<sub>3</sub>CSK<sub>4</sub> or R848 at 1  $\mu$ g/ml (upper panels). The same experiment performed in the presence of oATP (100  $\mu$ M) is displayed in lower panels. Numbers below the dot plots indicate the percentages of cells comprised within the markers. **(B,C):** Statistical analysis of three independent experiments with three replicates per point. Mean percentage values  $\pm$  SD (n=9) of cells with the indicated numbers of cell divisions (B). Statistical analysis showing mean  $\pm$  SD (n=9) cell recoveries and percentages of CD11b expressing cells (C).
