# Supplementary material
Source: PubMed Central journal article supplement (PMC3131989)
Supplement: cdd2010107x3.pdf [file cdd2010107x3.pdf]

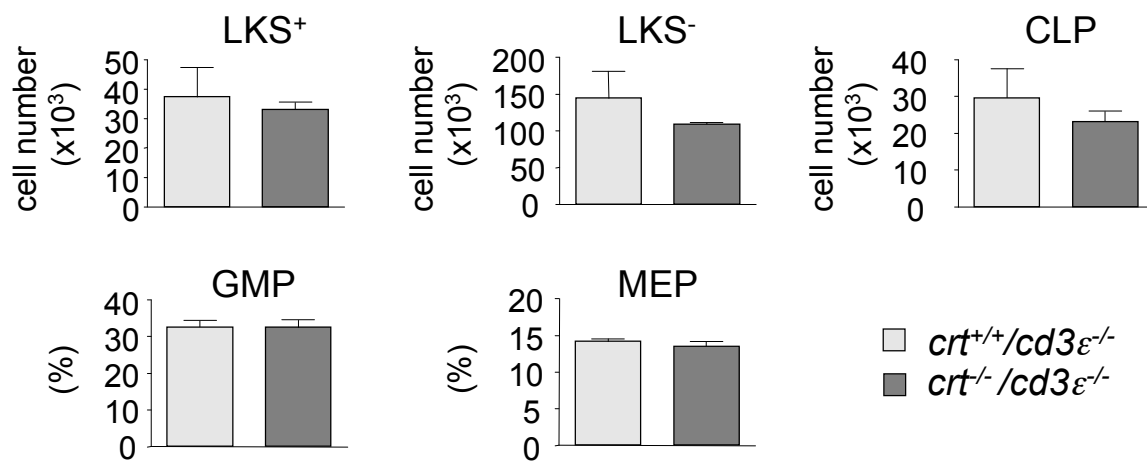

**Supplementary figure 3.** Unaltered BM LKS<sup>+</sup>, LKS<sup>-</sup> and lineage progenitors representation in  $crt^{-/-}/cd3\epsilon^{-/-}$  double KO FLC. Statistical analyses of the indicated subsets in the BM of  $crt^{+/+}/cd3\epsilon^{-/-}$  and  $crt^{-/-}/cd3\epsilon^{-/-}$  FLC at week 12 from reconstitution (n=4).
