# Supplementary material
Source: PubMed Central journal article supplement (PMC3131989)
Supplement: cdd2010107x4.pdf [file cdd2010107x4.pdf]

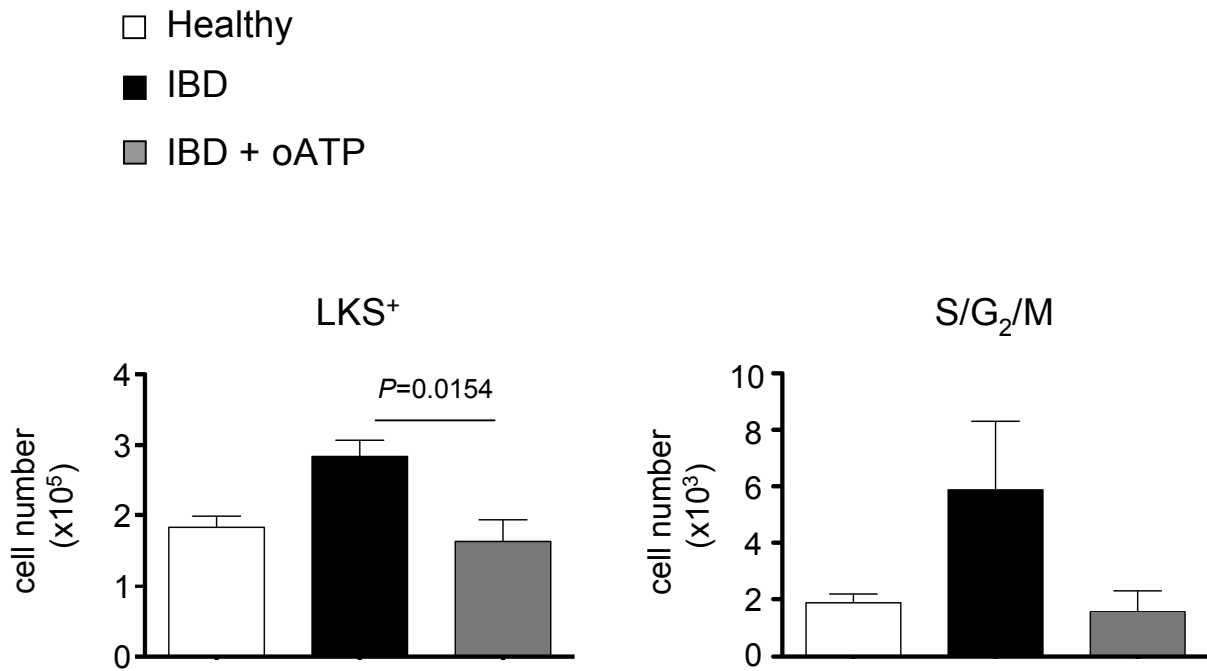

**Supplementary figure 4.** Inhibition of LKS<sup>+</sup> cell cycling by P2X antagonism during chronic inflammation. Analysis of electronically gated LKS<sup>+</sup> cells from bone marrow (femur and tibia from two legs) of healthy controls, mice with IBD and mice with IBD treated with oATP. Absolute cell numbers (left panel) and numbers of LKS<sup>+</sup> cells in the S/G<sub>2</sub>/M phases of the cell cycle (right panel) recovered from the different experimental groups are displayed (mean $\pm$ SD, n=5).
